# Supplementary material
Source: publisher figshare collection journal article supplement (https://aacr.figshare.com/articles/dataset/_/23668543)
Supplement: Supplementary file 1 [file 41536726]

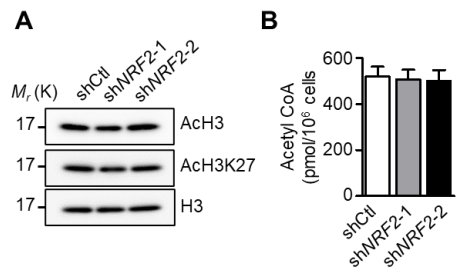

**Fig S5. NRF2 silencing shows no effect on histone acetylation or acetyl-CoA.** (A) immunoblot analyses histone acetylation (AcH3 and AcH3K27) in the nuclear extracts of shCtl and shNRF2 HepG2 cells. (B) Levels of acetyl-CoA in shCtl and shNRF2 HepG2 cell. Data represent as mean  $\pm$  SD (n=3 independent experiments).
